# Supplementary material
Source: PubMed Central journal article supplement (PMC2987476)
Supplement: ejhg201091x1.pdf [file ejhg201091x1.pdf]

Summers et al – Supplementary Tables.

Supplementary Table 1. List of cell lines and tissues used for the initial clustering analysis.

| <b>Cell line</b>    | <b>Cell type</b>                                                                                   |
|---------------------|----------------------------------------------------------------------------------------------------|
| 3T3-L1              | Embryonic fibroblast - adipocyte like                                                              |
| Baf3                | Pro B cell                                                                                         |
| C2C12               | Myoblast                                                                                           |
| mIMCD-3             | Renal inner medullary epithelial cell                                                              |
| min6                | Pancreatic beta cell, insulin secreting                                                            |
| neuro2a             | Neuroblastoma                                                                                      |
| NIH3T3              | Fibroblast                                                                                         |
| C3H 10T1/2          | Embryonic mesenchymal multipotent osteoblast progenitor                                            |
| Bruce4 p13          | Embryonic stem cell                                                                                |
| V26 2 p16           | Embryonic stem cell                                                                                |
| HSC                 | Purified lineage-negative haemopoietic stem cell                                                   |
| EP                  | Erythrocyte precursor                                                                              |
| GMP                 | Granulocyte/monocyte precursor                                                                     |
| Granulocytes        | Purified CD11b, Gr-1 peripheral granulocyte                                                        |
| CMP                 | Myeloid precursor                                                                                  |
| BMM 0               | Bone marrow-derived macrophage unstimulated                                                        |
| BMM 2               | Bone marrow macrophage 2 hrs after LPS                                                             |
| BMM 6               | Bone marrow macrophage 6 hrs after LPS                                                             |
| BMM 24              | Bone marrow macrophage 24 hrs after LPS                                                            |
| PM 0                | Thioglycollate-elicited peritoneal macrophage unstimulated                                         |
| PM 1                | Peritoneal macrophage 1hr after LPS thio                                                           |
| PM 7                | Peritoneal macrophage 7hrs after LPS thio                                                          |
| LD                  | Splenic lymphoid dendritic (CD11c+ CD8+)                                                           |
| MD                  | Splenic myeloid dendritic (CD11c, CD8-)                                                            |
| PD                  | Plasmacytoid dendritic (CD11c+, CD8+)                                                              |
| Microglia           | Microglial cell                                                                                    |
| Osteoclasts         | Osteoclast (CSF-1, RANKL-treated bone marrow cultures)                                             |
| Osteoblast 5        | Primary neonatal calvarial osteoblast 5 days after stimulation with glycerophosphate and ascorbate |
| Osteoblast 14       | Osteoblast 14 days after stimulation                                                               |
| Osteoblast 21       | Osteoblast 21 days after stimulation                                                               |
| RAW264/7            | Macrophage-like cell line                                                                          |
| Mast cells          | Culture-derived bone marrow mast cells (with IL3)                                                  |
| Mast cells IgE      | Mast cells plus IgE                                                                                |
| Mast cells IgE+Ag 1 | Mast cells plus IgE 1 hr after antigen                                                             |
| Mast cells IgE+Ag 6 | Mast cells plus IgE 6 hrs after antigen                                                            |
| NK                  | NK1.1-positive natural killer cells                                                                |
| MZB                 | Spleen marginal zone B lymphocyte                                                                  |
| FB                  | Lymph node B lymphocyte                                                                            |
| T helper            | CD4-positive T helper cells                                                                        |
| T cytotoxic         | CD8-positive Cytotoxic T cells                                                                     |
| T regulatory        | CD25-positive Regulatory T cells                                                                   |
| DPT                 | Thymocyte CD4+ CD8+ double-positive progenitors                                                    |
| SPT4                | Thymocyte CD4+                                                                                     |
| SPT8                | Thymocyte CD8+                                                                                     |
| Lymph node          | Lymph node cells                                                                                   |
| Spleen              | Splenocyte                                                                                         |

Chang MK, Raggatt L-J, Alexander KA *et al*: Osteal tissue macrophages are intercalated throughout human and mouse bone lining tissues and regulate osteoblast function in vitro and in vivo. *Journal of Immunology* 2008; **181**: 1232-1244.

Lattin JE, Schroder K, Su AI *et al*: Expression analysis of G Protein-Coupled Receptors in mouse macrophages. *Immunome Res* 2008; 4: 5.

Supplementary Table 2. List of genes which clustered with *Fbn1* at 0.9P (the *Fbn1*-associated cluster).

| <b>Gene Symbol</b> | <b>Gene Name and Aliases</b>                                                                                                                                           |
|--------------------|------------------------------------------------------------------------------------------------------------------------------------------------------------------------|
| 1200009F10Rik      | Inhibitor of IKK interacting protein                                                                                                                                   |
| 2310016C16Rik      | Probable glutathione peroxidase 8                                                                                                                                      |
| 2810055F11Rik      | Probable proline racemase                                                                                                                                              |
| 4833427G06Rik      | Unclassified                                                                                                                                                           |
| 8430436O14Rik      | Unclassified                                                                                                                                                           |
| 9330132E09Rik      | Dermatan-sulfate epimerase-like protein                                                                                                                                |
| AC153973.1         | Unclassified                                                                                                                                                           |
| AC154759.2-3       | Zinc finger, CCHC domain containing 24                                                                                                                                 |
| Acta2              | Alpha-2 actin, smooth muscle, aorta; vascular smooth muscle actin                                                                                                      |
| Adamts12           | A disintegrin-like and metalloproteinase with thrombospondin type 1 motif, member 12                                                                                   |
| Aebp1              | Aortic carboxypeptidase-like protein                                                                                                                                   |
| Ak1                | Adenylate kinase 1 (soluble)                                                                                                                                           |
| AL808105.15-1      | Unclassified                                                                                                                                                           |
| Ankrd25            | Ankyrin repeat domain 25                                                                                                                                               |
| Antxr1             | Anthrax toxin receptor 1                                                                                                                                               |
| Atoh8              | Drosophila atonal homologue 8                                                                                                                                          |
| Bgn                | Biglycan; proteoglycan I                                                                                                                                               |
| Bmper              | Bone morphogenic protein-binding endothelial cell precursor derived regulator; BMP-binding endothelial cell derived regulator; homologue of Drosophila crossveinless 2 |
| Boc                | Brother of CDON (cell adhesion molecule-related/downregulated by oncogenes)                                                                                            |
| Cacna2d1           | Voltage-dependent calcium channel subunit alpha-2/delta-1                                                                                                              |
| Cald1              | Caldesmon 1                                                                                                                                                            |
| Calu               | Calumenin                                                                                                                                                              |
| Capn6              | Calpain 6                                                                                                                                                              |
| Casp12             | Caspase 12, apoptosis related cysteine protease                                                                                                                        |
| Ccdc102a           | Coiled coil domain containing 102a                                                                                                                                     |
| Ccdc80             | Steroid sensitive protein 1                                                                                                                                            |
| Cd248              | CD248 antigen; tumour endothelial marker; endosialin                                                                                                                   |
| Cdc42ep5           | CDC42 (cell division cycle 42) effector protein; CEP5; binder of Rho GTPases 3 (BORG3)                                                                                 |
| Cdh11              | Cadherin 11; osteoblast cadherin                                                                                                                                       |
| Chsy3              | Chondroitin sulfate synthase 3                                                                                                                                         |
| Col11a1            | Collagen type XI alpha 1 chain                                                                                                                                         |
| Col12a1            | Collagen type XII alpha 1 chain                                                                                                                                        |
| Col16a1            | Collagen type XVI, alpha 1 chain                                                                                                                                       |
| Col1a1             | Collagen type I alpha 1 chain; collagen of skin, tendon and bone                                                                                                       |
| Col1a2             | Collagen type I alpha 2 chain; collagen of skin, bone, tendon                                                                                                          |
| Col3a1             | Collagen type III alpha 1 chain; fetal collagen; blood vessel collagen                                                                                                 |
| Col4a1             | Collagen type IV alpha 1 chain; basement membrane collagen; arresten                                                                                                   |
| Col4a2             | Collagen type IV alpha 2 chain; basement membrane collagen; arresten                                                                                                   |
| Col5a1             | Collagen type V alpha 1 chain                                                                                                                                          |
| Col5a2             | Collagen type V alpha 2 chain; fetal membrane collagen; AB collagen                                                                                                    |
| Col6a1             | Collagen type VI alpha 1 chain; intimal collagen; short chain collagen                                                                                                 |

|             |                                                                                                                    |
|-------------|--------------------------------------------------------------------------------------------------------------------|
| Col6a2      | Collagen type VI alpha 2 chain                                                                                     |
| Copz2       | Coatomer protein complex, subunit zeta 2                                                                           |
| Cpa6        | Carboxypeptidase A6; CPAH                                                                                          |
| Ctf1        | Cardiotrophin 1                                                                                                    |
| Cyp1b1      | Cytochrome P450, subfamily 1 polypeptide 1                                                                         |
| D10Ertd610e | RAC/cdc42 exchange factor                                                                                          |
| Dcamk11     | Doublecortin and calmodulin kinase like domain 1; KIAA0369                                                         |
| Ddr2        | Discoidan domain receptor family member 2; neurotrophic tyrosine kinase receptor related; NTRKR3; TKT              |
| Dnm3os      | Dynamin 3, opposite strand                                                                                         |
| Dock1       | Dedicator of cytokinesis 1; downstream of CRK binding protein, 180kD; homologue of C. elegans ced5                 |
| Edg2        | Endothelial differentiation gene 2; lysophosphatidic acid receptor egd2; ventricular zone gene                     |
| Efemp2      | EGF containing fibulin-like extracellular matrix protein 2;; Fibulin 4; FBLN4                                      |
| Epdr2       | Ependymin related protein 2 (zebrafish)                                                                            |
| Ephb2       | Ephrin receptor; ELK related tyrosone kinase; ERK; (developmentally regulated) EPH tyrosine kinase 3; HEK5         |
| Ephb3       | Ephrin receptor; EPH-like tyrosone kinase 2; human embryo kinase 2; HEK2; TYRO6                                    |
| Fam114a1    | Family with sequence similarity 114 member a1                                                                      |
| Fam115c     | Family with sequence similarity 115 member c                                                                       |
| Fbn1        | Fibrillin 1                                                                                                        |
| Fgfr2       | Fibroblast growth factor receptor 2; protein tyrosine kinase receptor like 14; keratinocyte growth factor receptor |
| Fibin       | Fin bud initiation factor homolog                                                                                  |
| Figf        | Fos-induced growth factor; vascular endothelial growth factor D                                                    |
| Fkbp10      | FK506 binding protein 10                                                                                           |
| Fkbp14      | FK506 binding protein 14                                                                                           |
| Fkbp9       | FK506 binding protein 9                                                                                            |
| Fn1         | Fibronectin 1; large external transformation sensitive protein; FNZ                                                |
| Fstl1       | Follistatin-like 1; follistatin related protein                                                                    |
| Fzd1        | Homologue of drosophila Frizzled, member 1                                                                         |
| Fzd2        | Homologue of drosophila Frizzled, member 2                                                                         |
| Gas1        | Growth arrest specific 1                                                                                           |
| Gas2        | Growth arrest specific 2                                                                                           |
| Ggcx        | Gamma glutamyl carboxylase                                                                                         |
| Gpc6        | Glypican 6                                                                                                         |
| Gpr124      | G-protein coupled receptor 124                                                                                     |
| Gpr177      | G-protein coupled receptor 177                                                                                     |
| Gpr23       | G-protein coupled receptor 23; purinergic receptor P2Y, G protein coupled 9; P2Y5-like receptor                    |
| Gstm2       | Glutathione S transferase Mu 2; GST4; muscle GST                                                                   |
| Gulp1       | PTB domain-containing engulfment adaptor protein 1; CED6                                                           |
| Has2        | Hyaluronan synthase 2                                                                                              |
| Id3         | Inhibitor of DNA binding 3; HEIR1                                                                                  |
| Il6st       | Interleukin 6 signal transducer; GP130 transducer chain                                                            |
| Irs1        | Insulin receptor substrate 1                                                                                       |
| Irx3        | Iroquois homeobox protein 1                                                                                        |
| Kdelr3      | KDEL (Lys-Asp-Glu-Leu) endoplasmic reticulum protein retention receptor 3                                          |

|         |                                                                                                                                                         |
|---------|---------------------------------------------------------------------------------------------------------------------------------------------------------|
| Lama4   | Laminin alpha 4 (formerly LAMA3)                                                                                                                        |
| Lamb2   | Laminin beta 2; laminin s; laminin B1                                                                                                                   |
| Lepre1  | Leucine and proline enriched proteoglycan 1; leprecan; prolyl 3 hydroxylase 1; growth suppressor 1                                                      |
| Lgals7  | Soluble galactoside binding lectin 7; galectin 7                                                                                                        |
| Lix11   | Lix 1 like; limb expression 1 like                                                                                                                      |
| Lox     | Lysyl oxidase                                                                                                                                           |
| Loxl1   | Lysyl oxidase like 1                                                                                                                                    |
| Loxl3   | Lysyl oxidase like 3                                                                                                                                    |
| Lrig3   | Leucine-rich repeats and immunoglobulin-like domains 3                                                                                                  |
| Lrrc17  | Leucine rich repeat containing 17                                                                                                                       |
| Lrrn4cl | LRRN4 C-terminal like                                                                                                                                   |
| Ltbp2   | Latent transforming growth factor binding protein 2 (formerly LTBP3)                                                                                    |
| Map4k5  | Mitogen activated protein kinase kinase kinase 5; MAPKKKK5                                                                                              |
| Mark1   | MAP/microtubule affinity regulating kinase 1                                                                                                            |
| Matn2   | Matrilin 2                                                                                                                                              |
| Mkx     | Mohawk                                                                                                                                                  |
| Mmp2    | Matrix metalloproteinase; collagenase type IV; gelatinase                                                                                               |
| Mrc2    | Mannose receptor C type 2                                                                                                                               |
| Mrgprf  | MAS-related GPR, member F                                                                                                                               |
| Msrb3   | Methionine sulphoxide reductase B 3                                                                                                                     |
| Mxra7   | Matrix remodelling associated 7                                                                                                                         |
| Myl9    | Myosin light chain 9, regulatory                                                                                                                        |
| Naalad2 | N-acetylated alpha linked acidic dipeptidase 2; NAALADase II                                                                                            |
| Ndn     | Necdin                                                                                                                                                  |
| Nfatc4  | Nuclear factor of activated T cells, calcineurin dependent                                                                                              |
| Nfix    | Nuclear factor 1, X type; CCAAT binding transcription factor                                                                                            |
| Npr2    | Natriuretic peptide receptor B; guanylate cyclase B; atrial natriuretic peptide receptor type B                                                         |
| Npr3    | Natriuretic peptide receptor C; atrial natriuretic peptide clearance receptor                                                                           |
| Nr2f1   | Nuclear receptor subfamily 2, group F, member 1; transcription factor COUP1; chicken ovalbumin upstream promoter transcription factor; ERB-A related 3; |
| Nuak1   | NUAK family, SNF1-like kinase 1                                                                                                                         |
| Obsl1   | Obscurin-like 1                                                                                                                                         |
| Palld   | Palladin                                                                                                                                                |
| Parva   | Parvin alpha                                                                                                                                            |
| Pcdh18  | Protocadherin 18; KIAA1562                                                                                                                              |
| Pcdhb22 | Protocadherin beta 22                                                                                                                                   |
| Pcdhgb1 | Protocadherin gamma cluster                                                                                                                             |
| Pcolce  | Procollagen c-endopeptidase enhancer                                                                                                                    |
| Pdgfrb  | Platelet derived growth factor receptor beta                                                                                                            |
| Pdgfrl  | Platelet derived growth factor receptor like; platelet derived growth factor beta-like tumour suppressor                                                |
| Pdlim2  | PDZ and LIM domain containing protein 2; mystique; STAT interacting LIM protein (SLIM)                                                                  |
| Pdzn3   | PDZ domain containing RING finger 3                                                                                                                     |
| Phldb2  | Pleckstrin homology-like domain, family B member 2                                                                                                      |
| Pkd2    | Polycystic kidney disease 2; PKD adult type; polycystin 2                                                                                               |
| Plekhf1 | Pleckstrin homology domain containing, family F (with FYVE domain)                                                                                      |

|          |                                                                                                                                                                           |
|----------|---------------------------------------------------------------------------------------------------------------------------------------------------------------------------|
|          | member 1                                                                                                                                                                  |
| Plekhg4  | Pleckstrin homology domain containing, family G (with RhoGef domain)<br>member 4                                                                                          |
| Pls3     | Plastin 3; T-plastin                                                                                                                                                      |
| Pmepa1   | Prostate transmembrane protein, androgen induced 1; transmembrane prostate<br>androgen-induced RNA                                                                        |
| Postn    | Periostin; osteoblast specific factor 2                                                                                                                                   |
| Ppap2a   | Phosphatidic acid phosphatase type 2A                                                                                                                                     |
| Ppic     | Peptidyl-prolyl isomerase C; cyclophilin C                                                                                                                                |
| Prickle2 | Homologue of Drosophila prickle, member 2                                                                                                                                 |
| Prkcdbp  | Protein kinase C, delta binding protein                                                                                                                                   |
| Prrx1    | Paired mesoderm homeobox 1; paired related homeobox gene 1                                                                                                                |
| Prrx2    | Paired-related homeobox 2; paired-like homeobox gene 2                                                                                                                    |
| Prss23   | Serine protease 23                                                                                                                                                        |
| Ptgis    | Prostaglandin I2 synthase; prostacyclin synthase; CYP8; CYP8A1                                                                                                            |
| Ptn      | Pleiotropin; neurite outgrowth promoting factor; heparin binding growth factor<br>8                                                                                       |
| Ptx3     | Pentraxin 3; pentaxin 3                                                                                                                                                   |
| Qscn6    | Quiescin Q6                                                                                                                                                               |
| Rbms3    | Single stranded interacting RNA binding motif protein 3                                                                                                                   |
| Rcn1     | Reticulocalbin 1                                                                                                                                                          |
| Rcn2     | Reticulocalbin 2; endoplasmic reticulum calcium binding protein 55kD;<br>TCBP49; E6 binding protein; vitamin D receptor associated factor                                 |
| Rcn3     | Reticulocalbin 3, EF-hand calcium binding domain                                                                                                                          |
| Rerg     | RAS-like, estrogen-regulated, growth-inhibitor                                                                                                                            |
| Rhoj     | Ras homologue gene family member J                                                                                                                                        |
| Rnd3     | RHO family GTPase 3; Ras homologue gene family member E; ARHE                                                                                                             |
| Ror1     | Receptor tyrosine kinase like orphan receptor 1; neurotrophic tyrosine kinase<br>receptor related 1                                                                       |
| Samd4    | sterile alpha motif domain containing 4                                                                                                                                   |
| Sc65     | synaptonemal complex protein Sc65                                                                                                                                         |
| Scarf2   | Scavenger receptor class F, member 2                                                                                                                                      |
| Sdc2     | Syndecan 2; heparan sulphate proteoglycan; fibroglycan                                                                                                                    |
| Sec23a   | scavenger receptor class F, member 2                                                                                                                                      |
| Selm     | Selenoprotein M; SEPM                                                                                                                                                     |
| Sema5a   | Sema domain, seven thrombospondin repeats (type 1 and type 1-like),<br>transmembrane domain (TM) and short cytoplasmic domain, (semaphorin) 5A                            |
| Sept11   | Septin 11                                                                                                                                                                 |
| Serpine2 | Serpin E2; serine (or cysteine) peptidase inhibitor, clade E, member 2; glial<br>derived neurite promoting factor; protease nexin 1                                       |
| Serpinf1 | Serpin F1; serine (or cysteine) peptidase inhibitor, clade F, member 1; pigment<br>epithelium derived factor                                                              |
| Serpinh1 | Serpin H1; serine (or cysteine) peptidase inhibitor, clade H, member 1; colligin<br>2; HSP47; rheumatoid arthritis antigen A47; collagen binding protein 2                |
| Sertad4  | SERTA domain containing 4; mammary gland RCB-0527 Jyg-MC(B) cDNA,<br>RIKEN full-length enriched library, clone:G930041P03 product:unclassifiable,<br>full insert sequence |
| Slc16a4  | Solute carrier family 16 (monocarboxylic acid transporter) member 4;<br>monocarboxylate transporter 5                                                                     |

|          |                                                                                                                                        |
|----------|----------------------------------------------------------------------------------------------------------------------------------------|
| Slc27a3  | Solute carrier family 27 (fatty acid transporter) member 3; fatty acid transport protein 3                                             |
| Slc2a10  | Solute carrier family 2 (facilitated glucose transporter) member 10; glucose transporter 10; GLUT10                                    |
| Slc35a2  | Solute carrier family 35 (UDP-galactose transporter) member 2; UDP-galactose translocator                                              |
| Slit3    | Homologue of Drosophila slit, member 3; SLIL2; multiple epidermal growth factor like domains 5                                         |
| Smad6    | Similar to Mothers against decapentaplegic homolog 6                                                                                   |
| Snai1    | Homologue of Drosophila snail, member 1                                                                                                |
| Snai2    | Homologue of Drosophila Snail, member 2; homologue of chicken SLUG; neural crest transcription factor                                  |
| Snx7     | Sorting nexin 7                                                                                                                        |
| Sox9     | SRY box 9; SRY related HMG box gene 9                                                                                                  |
| Sparc    | Acidic cysteine rich secreted protein; osteonectin                                                                                     |
| Stonin-1 | Stoned B-like factor                                                                                                                   |
| Svepl1   | Sushi, von Willibrand factor type A, EGF and pentraxin domains containing protein 1; polydom; selectin like osteoblast-derived protein |
| Synpo    | Synaptopodin                                                                                                                           |
| Tbx15    | T-box 15                                                                                                                               |
| Tfpi     | Tissue factor pathway inhibitor; extrinsic pathway inhibitor; lipoprotein associated coagulation inhibitor                             |
| Tgfb11   | Transforming growth factor beta 1 induced 1; androgen receptor co-activator; hydrogen peroxide inducible clone 5 (HIC5)                |
| Tgfb2    | Transforming growth factor beta 2; glioblastoma-derived T-cell suppressor factor (G-TSF)                                               |
| Tgfb3    | Transforming growth factor beta 3                                                                                                      |
| Thbd     | Thrombomodulin                                                                                                                         |
| Thbs1    | Thrombospondin 1                                                                                                                       |
| Thbs2    | Thrombospondin 2                                                                                                                       |
| Thbs3    | Thrombospondin 3                                                                                                                       |
| Timp1    | Tissue inhibitor of metalloproteinase 1; erythroid potentiating activity; collagenase inhibitor                                        |
| Timp2    | Tissue inhibitor of metalloproteinase 2;                                                                                               |
| Timp3    | Tissue inhibitor of metalloproteinase 3;                                                                                               |
| Tmem45a  | Transmembrane protein 45A                                                                                                              |
| Tmem58   | Transmembrane protein 58                                                                                                               |
| Tnfaip6  | Tumour necrosis factor alpha induced protein 6                                                                                         |
| Tpbp     | Trophoblast glycoprotein; M6P1                                                                                                         |
| Tpm1     | Tropomyosin; skeletal muscle alpha tropomyosin                                                                                         |
| Tspan6   | Tetraspanin 6; transmembrane 4 superfamily                                                                                             |
| Twist1   | Transcription factor TWIST; homologue of Drosophila TWIST                                                                              |
| Ubtd2    | Ubiquitin domain-containing protein 2                                                                                                  |
| Ugcgl2   | UDP-glucose ceramide glucosyltransferase-like 2                                                                                        |
| Vasnl    | Vasorin                                                                                                                                |
| Vcl      | Vinculin; metavinculin                                                                                                                 |
| Vgll3    | Vestigial like 3                                                                                                                       |
| Wisp1    | WNT1 inducible signalling pathway protein 1; member of connective tissue growth factor family (CCN)                                    |
| Zfp449   | Zinc finger protein 449                                                                                                                |

Zfp503  
Zfpm2

Zinc finger protein 503  
Zinc finger protein, multitype 2; friend of GATA2 (FOG2); modulator of transcription factor GATA4;



Supplementary Table 3. Clustering of gene expression in mouse tissues.

| <b>Gene Symbol</b> | <b>Full Name</b>                                                                             | <b>In <i>Fbn1</i>-associated cluster?</b> |
|--------------------|----------------------------------------------------------------------------------------------|-------------------------------------------|
| 1110025N19Rik      | Unclassified                                                                                 |                                           |
| 5330426P16Rik      | Unclassified                                                                                 |                                           |
| 6820427D17Rik      | Unclassified                                                                                 |                                           |
| Adam23             | A disintegrin-like and metalloproteinase, member 23                                          |                                           |
| Adamts1            | A disintegrin-like and metalloproteinase with thrombospondin type 1 motif, member 1          |                                           |
| Adamts2            | A disintegrin-like and metalloproteinase with thrombospondin type 1 motif, member 2          |                                           |
| Adamtsl4           | ADAMTS-like protein 4                                                                        |                                           |
| AK013470           | Unclassified                                                                                 |                                           |
| AK051785           | Unclassified                                                                                 |                                           |
| Ampd3              | AMP deaminase 3                                                                              |                                           |
| Anxa1              | Annexin A1                                                                                   |                                           |
| Aspn               | Asporin                                                                                      |                                           |
| Axl                | Tyrosine-protein kinase receptor UFO                                                         |                                           |
| BC014809.1         | Similar to tropomyosin 2 (beta)                                                              |                                           |
| Bgn                | Biglycan; proteoglycan I                                                                     | Yes                                       |
| Bhlha9             | Class A basic helix-loop-helix protein 9; Class B basic helix-loop-helix factor 42 (Bhlhf42) |                                           |
| Bmp4               | Bone morphogenic protein-binding 4                                                           |                                           |
| Calu               | Calumenin                                                                                    | Yes                                       |
| Capn6              | Calpain 6                                                                                    | Yes                                       |
| Ccl2               | C-C motif chemokine 2                                                                        |                                           |
| Cd44               | CD44 antigen                                                                                 |                                           |
| Cdkn1c             | Cyclin-dependent kinase inhibitor 1C                                                         |                                           |
| Clic4              | Chloride intracellular channel protein 4                                                     |                                           |
| Col15a1            | Collagen type XV alpha 1 chain                                                               |                                           |
| Col16a1            | Collagen type XVI, alpha 1 chain                                                             | Yes                                       |
| Col2a1             | Collagen type II, alpha 1 chain                                                              |                                           |
| Col4a1             | Collagen type IV alpha 1 chain; basement membrane collagen; arresten                         | Yes                                       |
| Col4a2             | Collagen type IV alpha 2 chain; basement membrane collagen; arresten                         | Yes                                       |
| Col4a5             | Collagen type IV alpha 5 chain; basement membrane collagen; arresten                         |                                           |
| Col4a6             | Collagen type IV alpha 6 chain; basement membrane collagen; arresten                         |                                           |
| Col5a1             | Collagen type V alpha 1 chain                                                                | Yes                                       |
| Colec12            | Collectin-12; Collectin placenta protein 1; Scavenger receptor with C-type lectin            |                                           |
| Corin              | Atrial natriuretic peptide-converting enzyme                                                 |                                           |
| Crispld2           | Cysteine-rich secretory protein LCCL domain-containing 2                                     |                                           |
| Csrp2              | Cysteine and glycine-rich protein 2                                                          |                                           |
| Ctgf               | Connective tissue growth factor                                                              |                                           |

|               |                                                                                                   |     |
|---------------|---------------------------------------------------------------------------------------------------|-----|
| Cthrc1        | Collagen triple helix repeat-containing protein 1                                                 |     |
| Cxcl7         | Pro-platelet basic protein (Ppbb)                                                                 |     |
| Cyr61         | Protein CYR61; Cysteine-rich angiogenic inducer 61; Insulin-like growth factor-binding protein 10 |     |
| Dnm3os        | Dynamin 3, opposite strand                                                                        | Yes |
| Egln3         | EGL nine homolog 3 ( <i>C. elegans</i> )                                                          |     |
| Eln           | Elastin                                                                                           |     |
| F2r           | Proteinase-activated receptor 1 (PAR-1); Thrombin receptor                                        |     |
| Fbln2         | Fibulin 2                                                                                         |     |
| Fbn1          | Fibrillin 1                                                                                       | Yes |
| Fbn2          | Fibrillin 2                                                                                       |     |
| Fkbp10        | FK506 binding protein 10                                                                          | Yes |
| Fkhl18        | Forkhead box protein S1                                                                           |     |
| Fstl3         | Follistatin-like 3; follistatin related protein                                                   |     |
| Galnt2        | Polypeptide N-acetylgalactosaminyltransferase 2                                                   |     |
| Gfpt2         | Glucosamine--fructose-6-phosphate aminotransferase 2                                              |     |
| Ghr           | Growth hormone receptor                                                                           |     |
| Glipr1        | Glioma pathogenesis-related protein 1                                                             |     |
| gnf1m33829_at | Unclassified                                                                                      |     |
| Gpc3          | Glypican 3                                                                                        |     |
| Gpc6          | Glypican 6                                                                                        | Yes |
| Gpr124        | G-protein coupled receptor 124                                                                    | Yes |
| Gpx7          | Glutathione peroxidase 7                                                                          |     |
| Grb10         | Growth factor receptor-bound protein 10                                                           |     |
| H19           | H19 fetal liver mRNA                                                                              |     |
| Hand2         | Heart- and neural crest derivatives-expressed protein 2                                           |     |
| Hspg2         | Basement membrane-specific heparan sulfate proteoglycan core protein                              |     |
| Htra1         | Serine protease HTRA1; Serine protease 11                                                         |     |
| Igf2          | Insulin-like growth factor II                                                                     |     |
| Igf2r         | Cation-independent mannose-6-phosphate receptor; Insulin-like growth factor 2 receptor            |     |
| Igfbp3        | Insulin-like growth factor-binding protein 3                                                      |     |
| Itga5         | Integrin alpha-5                                                                                  |     |
| Itgb5         | Integrin beta-5                                                                                   |     |
| Itm2a         | Integral membrane protein 2A; E25 protein                                                         |     |
| Klra4         | Killer cell lectin-like receptor 4; T-cell surface glycoprotein Ly-49D                            |     |
| Lamc1         | Laminin subunit gamma-1(formerly laminin B2 chain)                                                |     |
| Lamc2         | Laminin subunit gamma-2 (formerly laminin 5 gamma 2 subunit)                                      |     |
| Lmcd1         | LIM and cysteine-rich domains protein 1                                                           |     |
| Lox           | Lysyl oxidase                                                                                     | Yes |
| Loxl2         | Lysyl oxidase like 2                                                                              |     |
| Ltbp1         | Latent transforming growth factor binding protein 1                                               |     |
| Mfap4         | Microfibril associated protein 4                                                                  |     |
| Mfap5         | Microfibril associated protein 5                                                                  |     |

|           |                                                                                                     |     |
|-----------|-----------------------------------------------------------------------------------------------------|-----|
| Msln      | Mesothelin                                                                                          |     |
| Muc16     | Putative uncharacterized proteinMCG4778                                                             |     |
| Myadm     | Myeloid-associated differentiation marker                                                           |     |
| Nid1      | Nidogen-1                                                                                           |     |
| Nrk       | Nik-related protein kinase                                                                          |     |
| Olfml2b   | Olfactomedin-like protein 2B                                                                        |     |
| Olf78     | Olfactory receptor 78                                                                               |     |
| P4ha2     | Prolyl 4-hydroxylase subunit alpha-2                                                                |     |
| Palld     | Palladin                                                                                            | Yes |
| Pdpm      | Podoplanin                                                                                          |     |
| Pdzrn3    | PDZ domain containing RING finger 3                                                                 | Yes |
| Pitx2     | Pituitary homeobox 2; Paired-like homeodomain transcription factor 2                                |     |
| Plac9     | Placenta-specific protein 9                                                                         |     |
| Plagl1    | Pleiomorphic adenoma gene-like 1                                                                    |     |
| Plekha1   | Fermitin family homolog 2; Pleckstrin homology domain-containing family C member 1                  |     |
| Postn     | Periostin; osteoblast specific factor 2                                                             | Yes |
| Ppic      | Peptidyl-prolyl cis-trans isomerase C                                                               |     |
| Ralb      | Ras-related protein Ral-B                                                                           |     |
| Rbms2     | Single stranded interacting RNA binding motif protein 2                                             |     |
| Rcn3      | Reticulocalbin 3, EF-hand calcium binding domain                                                    | Yes |
| Rhoj      | Ras homologue gene family member J                                                                  | Yes |
| Ror1      | Receptor tyrosine kinase like orphan receptor 1; neurotrophic tyrosine kinase receptor related 1    | Yes |
| Serpina3n | Serine protease inhibitor A3N                                                                       |     |
| Serpinb9b | Serine (or cysteine) proteinase inhibitor, clade B, member 9b                                       |     |
| Snx24     | Sorting nexin-24                                                                                    |     |
| Sorbs1    | Sorbin and SH3 domain-containing protein 1                                                          |     |
| Stfa2l1   | Stefin A2 like 1                                                                                    |     |
| Stfa3     | Stefin A-like protein                                                                               |     |
| Taf10     | Transcription initiation factor TFIID subunit 10                                                    |     |
| Tgfb3     | Transforming growth factor beta 3                                                                   | Yes |
| Thbs3     | Thrombospondin 3                                                                                    | Yes |
| Timp1     | Tissue inhibitor of metalloproteinase 1; erythroid potentiating activity; collagenase inhibitor     | Yes |
| Tle4      | Transducin-like enhancer protein 4; Groucho-related protein 4 (Grg-4)                               |     |
| Tnc       | Tenascin                                                                                            |     |
| Trim47    | Tripartite motif-containing protein 47                                                              |     |
| Vcan      | Versican core protein                                                                               |     |
| Vcl       | Vinculin; metavinculin                                                                              | Yes |
| Vim       | Vimentin                                                                                            |     |
| Vwf       | von Willebrand factor                                                                               |     |
| Wisp1     | WNT1 inducible signalling pathway protein 1; member of connective tissue growth factor family (CCN) | Yes |
| Wnt2      | Wingless-related MMTV integration site 2                                                            |     |

Supplementary Table 4a. Summary of diseases and phenotypes associated with genes of the *Fbn1*-associated gene cluster.

| <b>Tissue</b>                           | <b>Number in human</b> | <b>Number in mouse</b> |
|-----------------------------------------|------------------------|------------------------|
| Bone                                    | 10                     | 10                     |
| Skin                                    | 6                      | 2                      |
| Joints and ligaments                    | 5                      | 1                      |
| Heart and heart valves                  | 4                      | 3                      |
| Eyes                                    | 4                      | 2                      |
| Renal system                            | 2                      | 2                      |
| Pigmentation                            | 1                      | 0                      |
| Blood coagulation                       | 2                      | 1                      |
| Blood vessels                           | 5                      | 6                      |
| Skeletal muscles                        | 3                      | 1                      |
| Nerves and brain                        | 0                      | 3                      |
| Lung                                    | 0                      | 5                      |
| Uterus                                  | 0                      | 1                      |
| Embryonic lethal                        | 0                      | 8                      |
| Reduced life span,<br>neonatal death    | 0                      | 6                      |
| Adipose                                 | 1                      | 2                      |
| Inflammatory response,<br>immune system | 0                      | 4                      |

Supplementary Table 4b. List of genes associated with disease or phenotype in mouse and human.

| Gene Name        | Phenotype in human                                                                                                            | Phenotype in mouse                                                                                   |
|------------------|-------------------------------------------------------------------------------------------------------------------------------|------------------------------------------------------------------------------------------------------|
| Aebp1            |                                                                                                                               | KO mice have abnormalities of embryonic development and adult tissue repair                          |
| Ak1              |                                                                                                                               | KO mice have myofibre abnormality                                                                    |
| Bgn              |                                                                                                                               | KO mice have reduced growth rate and bone mass                                                       |
| Casp12           |                                                                                                                               | Mice with deletion clear bacterial infections more rapidly than WT                                   |
| Cd248            |                                                                                                                               | Null mice have reduced growth of implanted colorectal carcinoma                                      |
| Col1A1<br>Col1A2 | Osteogenesis imperfecta type I, classical Ehlers Danlos syndrome                                                              |                                                                                                      |
| Col2A1           | Stickler syndrome type III (bone, eye phenotype); Marshall syndrome                                                           | Deficient mice have chondrodysplasia (wide, short bones)                                             |
| Col3A1           | Ehlers Danlos syndrome type IV                                                                                                |                                                                                                      |
| Col4A1           |                                                                                                                               | Mutant mice have brain, size, ocular and renal abnormalities                                         |
| Col5A1           | Ehlers Danlos syndrome type I/II, Ehlers Danlos syndrome type VII, corneal abnormalities, vascular weakness                   |                                                                                                      |
| Col5A2           | Severe Ehlers Danlos syndrome type I                                                                                          |                                                                                                      |
| Col6A1<br>Col6A2 | Bethlem myopathy, Ulrich congenital muscular dystrophy                                                                        | KO mice have abnormal skeletal muscle fibres                                                         |
| Cpa6             | Duane muscular retraction syndrome                                                                                            |                                                                                                      |
| Cyp1B1           | Primary congenital glaucoma, Peters anomaly of the eye                                                                        |                                                                                                      |
| Efemp2           | Cutis laxa                                                                                                                    |                                                                                                      |
| Ephb2            |                                                                                                                               | Deficient mice have synaptic plasticity defect                                                       |
| Ephb3            |                                                                                                                               | Mice deficient in both <i>Ephb2</i> and <i>Ephb3</i> have axonal patterning defect plus cleft palate |
| Fgfr2            | Cruzon, Pfeiffer, Alport, Jackson Weiss syndromes, craniosynostosis, autosomal dominant lacrimoauriculo dentodigital syndrome |                                                                                                      |
| Fn1              | Ehlers Danlos syndrome Type X                                                                                                 |                                                                                                      |
| Gas1             |                                                                                                                               | Null mice have craniofacial abnormalities                                                            |
| Ggcx             | Multiple coagulation factor deficiency                                                                                        | Null mice have pre or postnatal death with intra-abdominal hemorrhage                                |

|        |                                                                                               |                                                                                      |
|--------|-----------------------------------------------------------------------------------------------|--------------------------------------------------------------------------------------|
| Il6st  |                                                                                               | Ventricular KO mice have dilated cardiomyopathy during aortic pressure overload      |
| Irs1   |                                                                                               | Null mice have severe osteopenia and bone turnover                                   |
| Lama4  |                                                                                               | Null mice have bleeding, locomotor abnormalities, poor microvessel growth            |
| Lamb2  | Pierson syndrome                                                                              | Null mice have abnormal neuromuscular junctions, abnormal glomerular filtration      |
| Lepre1 | Osteogenesis imperfecta type VIII                                                             |                                                                                      |
| Lox    |                                                                                               | Null mice have aortic and lung abnormality; death at birth                           |
| Lox11  | Glaucoma                                                                                      | Null mice have lung, uterine, vascular abnormalities                                 |
| Ltbp2  |                                                                                               | Null mice die at preimplantation stage                                               |
| Mmp2   | Osteolysis (vanishing bone) syndrome                                                          | Null mice have airway inflammatory problems, reduced angiogenesis/neovascularisation |
| Mstb3  |                                                                                               | Null mice have shortened life span, sensitivity to oxidative stress                  |
| Ndn    |                                                                                               | Mice with paternal deletion allele suffer early postnatal lethality                  |
| Nfatc4 |                                                                                               | Embryonic lethal (E11) with vessel and cardiac abnormalities                         |
| Nfix   |                                                                                               | Null mice die at 1 month of age with skeletal and growth deficiencies                |
| Npr3   |                                                                                               | Natural mutant mice have overgrowth of long bones, emaciated phenotype               |
| Obsl1  | 3M syndrome type 2 with growth retardation, short stature                                     |                                                                                      |
| Pdlim2 |                                                                                               | Null mice have enhanced inflammatory response                                        |
| Pkd2   | Polycystic kidney disease type 2 with cerebral hemorrhage and aneurysm, cardiac valve disease |                                                                                      |
| Prrx1  |                                                                                               | Loss of function mutation is neonatal lethal with skeletal defects                   |
| Prrx2  |                                                                                               | <i>Prrx1/Prrx2</i> double mutant mice have novel defects of skeleton, teeth          |
| Ptgis  | Essential hypertension                                                                        |                                                                                      |
| Ptx3   |                                                                                               | Null mice sensitive to invasive aspergillosis                                        |
| Ror1   |                                                                                               | Null mice die neonatally due to                                                      |

|          |                                                           |                                                                                                                      |
|----------|-----------------------------------------------------------|----------------------------------------------------------------------------------------------------------------------|
|          |                                                           | respiratory dysfunction                                                                                              |
| Sec23a   | Craniolelenticulosutural dysplasia                        |                                                                                                                      |
| Serpinf1 |                                                           | Null mice have abnormal eyes, epithelial cell hyperplasia                                                            |
| Serpinh1 | Recessive osteogenesis imperfecta                         | KO mice are embryonic lethal                                                                                         |
| Slc2a10  | Arterial tortuosity syndrome                              |                                                                                                                      |
| Slit3    |                                                           | Null mice have diaphragmatic hernia                                                                                  |
| Snai1    | Waardenburg syndrome type II, piebaldism                  |                                                                                                                      |
| Sparc    |                                                           | Null mice have cataracts, osteopenia, large fat pads, large adipocytes, implanted tumors grow more rapidly           |
| Synpo    |                                                           | Null mice have brain, renal abnormalities                                                                            |
| Tfp1     | P151L allele overrepresented in people with thrombophilia |                                                                                                                      |
| Tgfb3    | SNP associated with ossification of spine ligaments       | Null mice have cleft palate, delayed pulmonary development                                                           |
| Thbd     | Rare cause of severe thrombophilia                        | Disruption of gene is embryonic lethal due to trophoblast cell abnormalities                                         |
| Thbs1    |                                                           | Deficient mice have spinal abnormalities, high white blood cell count, lung abnormalities                            |
| Thbs2    | SNP associated with lumbar disc herniation                | Null mice have connective tissue abnormalities including fragile skin, increased bone thickness, long bleeding times |
| Timp3    | Sorsby fundus dystrophy                                   |                                                                                                                      |
| Tpm1     | Mild familial cardiac hypertrophy                         | KO is embryonic lethal, missense mutation results in cardiac abnormalities                                           |
| Twist1   |                                                           | <i>Twist1/Twist 2</i> double heterozygote has increased proinflammatory cytokines, cachexia, neonatal death          |

Supplementary Table 5. Transcription factor binding motifs over-represented in the cluster genes.

| Motif ID       | Transcription factor motif | Proportion of cluster genes containing site | Uncertainty for cluster genes | Proportion of non-cluster genes containing site | Uncertainty for non-cluster genes | Significance of over-representation (Z score) |
|----------------|----------------------------|---------------------------------------------|-------------------------------|-------------------------------------------------|-----------------------------------|-----------------------------------------------|
| M00649         | MAZ                        | 0.553846                                    | 0.035598                      | 0.099342                                        | 0.002345                          | 12.74024                                      |
| SP1_gershenson | SP1_gershenson             | 0.615385                                    | 0.034839                      | 0.174894                                        | 0.002978                          | 12.59755                                      |
| MA0039         | Klf4                       | 0.328205                                    | 0.033626                      | 0.048872                                        | 0.00169                           | 8.296611                                      |
| M01066         | BLIMP1                     | 0.292308                                    | 0.032571                      | 0.039343                                        | 0.001524                          | 7.758165                                      |
| M00491         | MAZR                       | 0.307692                                    | 0.033051                      | 0.062027                                        | 0.001891                          | 7.420663                                      |
| M00706         | TFII-I                     | 0.2                                         | 0.028645                      | 0.029077                                        | 0.001317                          | 5.960714                                      |
| MA0090         | TEAD                       | 0.169231                                    | 0.026851                      | 0.018627                                        | 0.00106                           | 5.604489                                      |
| M00734         | CIZ                        | 0.164103                                    | 0.026523                      | 0.02336                                         | 0.001184                          | 5.301216                                      |
| M00935_M00302  | NF-AT                      | 0.164103                                    | 0.026523                      | 0.031413                                        | 0.001368                          | 4.996229                                      |
| MA0041         | Foxd3                      | 0.138462                                    | 0.024733                      | 0.022008                                        | 0.00115                           | 4.70327                                       |
| sox2_human     | SOX2                       | 0.128205                                    | 0.023941                      | 0.019549                                        | 0.001085                          | 4.533845                                      |
| M00005         | AP-4                       | 0.117949                                    | 0.023098                      | 0.014938                                        | 0.000951                          | 4.45592                                       |
| MA0013         | Broad_complex_4            | 0.123077                                    | 0.023526                      | 0.02084                                         | 0.00112                           | 4.340758                                      |
| M00800         | AP-2                       | 0.128205                                    | 0.023941                      | 0.02668                                         | 0.001263                          | 4.234752                                      |
| MA0060         | NF_Y                       | 0.179487                                    | 0.027482                      | 0.063872                                        | 0.001917                          | 4.196815                                      |
| M00672         | TEF                        | 0.102564                                    | 0.021726                      | 0.013524                                        | 0.000906                          | 4.094728                                      |
| M00639         | HNF-6                      | 0.107692                                    | 0.022199                      | 0.016967                                        | 0.001013                          | 4.082681                                      |
| MA0017_MA0114  | NR2F1_HNF4                 | 0.107692                                    | 0.022199                      | 0.018934                                        | 0.001069                          | 3.993686                                      |
| M00456         | FAC1                       | 0.107692                                    | 0.022199                      | 0.020532                                        | 0.001112                          | 3.921394                                      |
| M00087_M00086  | Ik-1_Ik-2                  | 0.102564                                    | 0.021726                      | 0.018627                                        | 0.00106                           | 3.858844                                      |
| nanog_mm8      | NANOG_mouse                | 0.087179                                    | 0.020201                      | 0.010205                                        | 0.000788                          | 3.807464                                      |
| HMG_class:HMG: |                            |                                             |                               |                                                 |                                   |                                               |
| MF0011         | HMG                        | 0.092308                                    | 0.020729                      | 0.014631                                        | 0.000941                          | 3.74346                                       |
| M01004         | Helios                     | 0.092308                                    | 0.020729                      | 0.016537                                        | 0.001                             | 3.651138                                      |
| MA0005         | Agamous                    | 0.076923                                    | 0.019082                      | 0.007869                                        | 0.000693                          | 3.61639                                       |
| MA0038         | Gfi                        | 0.102564                                    | 0.021726                      | 0.024159                                        | 0.001204                          | 3.603252                                      |
| M00478         | Cdc5                       | 0.076923                                    | 0.019082                      | 0.008238                                        | 0.000709                          | 3.596964                                      |
| M00821         | Nrf2                       | 0.087179                                    | 0.020201                      | 0.016106                                        | 0.000987                          | 3.514034                                      |
| M00483         | ATF6                       | 0.097436                                    | 0.021236                      | 0.024282                                        | 0.001207                          | 3.439176                                      |



|                                            |                                |          |          |          |          |          |
|--------------------------------------------|--------------------------------|----------|----------|----------|----------|----------|
| M01058                                     | GFI1B                          | 0.071795 | 0.018486 | 0.01168  | 0.000842 | 3.248474 |
| M00964_M00631                              | FXR/RXR-<br>alpha_PXR,         | 0.066667 | 0.017863 | 0.008791 | 0.000732 | 3.237262 |
| M00532                                     | RP58                           | 0.061538 | 0.017209 | 0.005963 | 0.000604 | 3.227393 |
| M00261                                     | Olf-1                          | 0.071795 | 0.018486 | 0.012418 | 0.000868 | 3.208404 |
| MA0030                                     | FOXF2                          | 0.071795 | 0.018486 | 0.013033 | 0.000889 | 3.175016 |
| octsox_dimer_mm8                           | OCT4_SOX2_dimer_<br>mouse      | 0.071795 | 0.018486 | 0.013524 | 0.000906 | 3.148309 |
| MA0029                                     | Evi1                           | 0.061538 | 0.017209 | 0.008176 | 0.000706 | 3.098175 |
| M00418                                     | TGIF                           | 0.076923 | 0.019082 | 0.017828 | 0.001037 | 3.092317 |
| M00490                                     | Bach2                          | 0.066667 | 0.017863 | 0.011987 | 0.000853 | 3.057538 |
| M00056                                     | myogenin                       | 0.05641  | 0.016522 | 0.006762 | 0.000643 | 3.002763 |
| Homeobox_class:H<br>omeo:MF0010            | Homeobox                       | 0.061538 | 0.017209 | 0.012602 | 0.000875 | 2.839922 |
| MA0033                                     | FOXL1                          | 0.051282 | 0.015796 | 0.006701 | 0.00064  | 2.820094 |
| MA0083                                     | SRF                            | 0.046154 | 0.015025 | 0.005041 | 0.000555 | 2.734366 |
| M00514                                     | ATF4                           | 0.051282 | 0.015796 | 0.00836  | 0.000714 | 2.714554 |
| M00451                                     | NKX3A                          | 0.05641  | 0.016522 | 0.011803 | 0.000847 | 2.696387 |
| M00650                                     | MTF-1                          | 0.061538 | 0.017209 | 0.016844 | 0.001009 | 2.592657 |
| M00974_M00733                              | SMAD-4_SMAD                    | 0.05641  | 0.016522 | 0.013955 | 0.00092  | 2.565725 |
| MA0111                                     | Spz1                           | 0.046154 | 0.015025 | 0.007623 | 0.000682 | 2.561759 |
| M00947                                     | CP2/LBP-1c/LSF                 | 0.05641  | 0.016522 | 0.014139 | 0.000926 | 2.554528 |
| MA0015                                     | CF2_II                         | 0.046154 | 0.015025 | 0.00793  | 0.000695 | 2.541219 |
| MA0119                                     | Hox11_CTF1                     | 0.046154 | 0.015025 | 0.008176 | 0.000706 | 2.524788 |
| M00432                                     | TTF1                           | 0.041026 | 0.014204 | 0.005287 | 0.000569 | 2.514081 |
| MA0025                                     | NFIL3                          | 0.051282 | 0.015796 | 0.011619 | 0.00084  | 2.507511 |
| MA0004_MA0104_<br>MA0058_MA0059_<br>MA0093 | Arnt_MAX_MYC_M<br>AX_USF1_Mycn | 0.061538 | 0.017209 | 0.01875  | 0.001063 | 2.481639 |
| M00244_M00243_<br>M00246_M00245            | Egr-1_NGFI-C_Egr-<br>3_Egr-2   | 0.05641  | 0.016522 | 0.015369 | 0.000964 | 2.479896 |
| M00023                                     | Hox-1.3                        | 0.041026 | 0.014204 | 0.00584  | 0.000597 | 2.474955 |
| M00797                                     | HIF-1                          | 0.051282 | 0.015796 | 0.012295 | 0.000864 | 2.464561 |
| MA0089                                     | TCF11_MafG                     | 0.061538 | 0.017209 | 0.019549 | 0.001085 | 2.435096 |
| MA0075                                     | Prrx2                          | 0.05641  | 0.016522 | 0.018135 | 0.001046 | 2.31205  |
| M01073                                     | HIC1                           | 0.051282 | 0.015796 | 0.015676 | 0.000974 | 2.24992  |
| MA0082                                     | SQUA                           | 0.051282 | 0.015796 | 0.015983 | 0.000983 | 2.230416 |
| MA0094                                     | Ubx                            | 0.035897 | 0.013322 | 0.006455 | 0.000628 | 2.207593 |
| MA0063                                     | Nkx2_5                         | 0.035897 | 0.013322 | 0.006824 | 0.000645 | 2.1798   |

|        |        |          |          |          |          |          |
|--------|--------|----------|----------|----------|----------|----------|
| M00465 | POU6F1 | 0.041026 | 0.014204 | 0.010266 | 0.00079  | 2.162189 |
| M00281 | RFX1   | 0.05641  | 0.016522 | 0.020901 | 0.001122 | 2.144308 |
| M01013 | IPF1   | 0.035897 | 0.013322 | 0.008729 | 0.000729 | 2.036261 |
| MA0099 | Fos    | 0.051282 | 0.015796 | 0.019303 | 0.001079 | 2.019867 |

Supplementary Table 6. Genes from the initial *Fbn1*-associated cluster which were correlated at 0.95P

| <b>Gene Symbol</b> | <b>Protein Name</b>                                                                                   | <b>Description/Function</b>                                                                                                                                  |
|--------------------|-------------------------------------------------------------------------------------------------------|--------------------------------------------------------------------------------------------------------------------------------------------------------------|
| <i>Adamts12</i>    | A disintegrin-like and metalloproteinase with thrombospondin type 1 motif, member 12                  | Cell surface adhesion protein; mediates cell-cell and cell-extracellular matrix adhesion and/or proteolysis; expression upregulated by TGF $\beta$           |
| <i>Aebp1</i>       | Aortic carboxypeptidase-like protein                                                                  | Largely restricted to aorta, particularly to smooth muscle cells; perinuclear staining; secreted protein that associates with the ECM                        |
| <i>Bgn</i>         | Biglycan                                                                                              | Involved in proinflammatory response through TLR2 and 4 signalling; may function in connective tissue metabolism by binding to collagen fibrils and TGF-beta |
| <i>Ccdc80</i>      | Coiled coil domain containing 80                                                                      | Secreted from adipocytes; downregulated during osteoblast differentiation; located in ECM                                                                    |
| <i>Cd248</i>       | CD248 antigen; tumour endothelial marker; endosialin                                                  | Mediates cell adhesion and migration                                                                                                                         |
| <i>Coll1a1</i>     | Collagen type 1 alpha 1 chain                                                                         | Collagen of skin, tendon and bone                                                                                                                            |
| <i>Col3a1</i>      | Collagen type III alpha 1 chain                                                                       | Fetal collagen; blood vessel collagen                                                                                                                        |
| <i>Col5a2</i>      | Collagen type V alpha 2 chain                                                                         | Fetal membrane collagen; AB collagen                                                                                                                         |
| <i>Col6a2</i>      | Collagen type VI alpha 2 chain                                                                        | Short chain collagen found in microfibrillar structures                                                                                                      |
| <i>Ddr2</i>        | Discoidan domain receptor family member 2; neurotrophic tyrosine kinase receptor related; NTRKR3; TKT | Novel receptor protein tyrosine kinase                                                                                                                       |
| <i>Fbn1</i>        | Fibrillin-1                                                                                           | See text                                                                                                                                                     |
| <i>Fstl1</i>       | Folistatin-like 1                                                                                     | Secreted by fibroblasts; acts on macrophages to increase TNF, IL1B production, IL6 activity; TGF-beta inducible                                              |
| <i>Gpc6</i>        | Glypican 6                                                                                            | Glycosylphosphatidylinositol-anchored heparan sulfate proteoglycans; localized predominantly to mesenchymal tissues in the developing mouse embryo           |
| <i>Lepre1</i>      | Leucine and proline enriched proteoglycan 1; leprecan; prolyl 3 hydroxylase 1; growth suppressor 1    | Required for collagen biosynthesis, folding and assembly; carries KDEL ER retention motif                                                                    |
| <i>Lox</i>         | Lysyl oxidase                                                                                         | Cross-linking of collagens and elastin                                                                                                                       |
| <i>Loxl1</i>       | Lysyl oxidase like 1                                                                                  | Spacially defined elastin polymer deposition                                                                                                                 |
| <i>Lrrc17</i>      | Leucine rich repeat containing 17                                                                     | Unknown                                                                                                                                                      |
| <i>Mrc2</i>        | Mannose receptor C type 2                                                                             | Recycling endocytic receptor; functions in cell motility and remodeling of the extracellular matrix                                                          |
| <i>Msrb3</i>       | Methionine sulphoxide reductase B 3                                                                   | Unknown                                                                                                                                                      |
| <i>Nfatc4</i>      | Nuclear factor of activated T cells,                                                                  | Role in cardiac development -                                                                                                                                |

|                 |                                                                                                                                                                    |                                                                                                                                                                                        |
|-----------------|--------------------------------------------------------------------------------------------------------------------------------------------------------------------|----------------------------------------------------------------------------------------------------------------------------------------------------------------------------------------|
|                 | calcineurin dependent                                                                                                                                              | valves; transcription factor                                                                                                                                                           |
| <i>Npr2</i>     | Natriuretic peptide receptor B; guanylate cyclase B; atrial natriuretic peptide receptor type B                                                                    | Ligand is C natriuretic peptide; produces of cytoplasmic cyclic GMP                                                                                                                    |
| <i>Pdgfrb</i>   | Platelet derived growth factor receptor beta                                                                                                                       | Involved in PDGF-mediated angiogenesis                                                                                                                                                 |
| <i>Prrx1</i>    | Paired mesoderm homeobox 1; paired related homeobox gene 1                                                                                                         | Transcription factor of cardiac, skeletal and smooth muscle tissue in adults                                                                                                           |
| <i>Prrx2</i>    | Paired mesoderm homeobox 2; paired related homeobox gene 2                                                                                                         | Strongly expressed in proliferating fibroblasts                                                                                                                                        |
| <i>Prss23</i>   | Serine protease 23                                                                                                                                                 | Unknown                                                                                                                                                                                |
| <i>Sdc2</i>     | Syndecan 2; heparan sulphate proteoglycan; fibroglycan                                                                                                             | Transmembrane protein, expressed on endothelial cells                                                                                                                                  |
| <i>Serpinf1</i> | Serpin F1; serine (or cysteine) peptidase inhibitor, clade F, member 1; pigment epithelium derived factor                                                          | Coordinates retinal neuronal and vascular functions; inhibits angiogenesis in mammalian ocular compartment                                                                             |
| <i>Serpinh1</i> | Serpin H1; serine (or cysteine) peptidase inhibitor, clade H, member 1; colligin 2; HSP47; rheumtoid arthritis antigen A47; collagen binding protein 2 (CBP1 also) | Collagen specific molecular chaperone                                                                                                                                                  |
| <i>Sparc</i>    | Secreted protein acidic cysteine rich; osteonectin                                                                                                                 | Matrix associated protein; involved in cell shape determination (F-actin dependent), cell cycle progression, synthesis of ECM                                                          |
| <i>Tgfb1i1</i>  | Transforming growth factor beta 1 induced 1; androgen receptor co-activator; hydrogen peroxide inducible clone 5 (HIC5)                                            | Induced by TGF beta and hydrogen peroxide; increased during cellular senescence of normal human fibroblasts; interacts with and enhances transcriptional activity of androgen receptor |
| <i>Tmem45a</i>  | Transmembrane protein 45A                                                                                                                                          | Unknown                                                                                                                                                                                |
| <i>Vgll3</i>    | Vestigial like 3                                                                                                                                                   | Contains a TEAD1 interaction domain                                                                                                                                                    |
